# Supplementary material
Source: PubMed Central journal article supplement (PMC2896228)
Supplement: NIHMS175423-supplement-1_si_001.pdf [file NIHMS175423-supplement-1_si_001.pdf]

## Supporting Information for

### Characterization of proton coupled electron transfer in a biomimetic oxomanganese complex: Evaluation of the DFT/B3LYP level of theory

Ting Wang, Gary Brudvig and Victor S. Batista\*

*Department of Chemistry, Yale University, New Haven, Connecticut 06520-8107*

RECEIVED DATE (publisher); \*E-mail: [victor.batista@yale.edu](mailto:victor.batista@yale.edu)

#### This PDF file includes:

##### Methods and Models

- DFT Methods: Exchange-correlation functional and basis sets (p. S2)
- Structural Models: Cartesian coordinates (p. S4), spin population analysis (p. S7), electrostatic potential (ESP) atomic charges (p. S9).
- Calculations of pKa's and redox potentials: Thermodynamic cycle (p. S8) and thermodynamic energy data (p. S11).

##### Tables

- **Table S1.** Comparison between DFT/B3LYP and X-ray experimental inter-atomic distances (Å) in complex **1** (p. S3)
- **Table S2.** Thermodynamic energy data for complex **1** and its derivative at T=298.15 K (p. S11)

##### Figures

- **Figure S1.** Schematic diagram of PCET in complex **1** (p. S3)

##### References:

References for Supporting Information. (p. S12)

## DFT Methods and Basis Sets

All ab initio computations were performed at the DFT/B3LYP level of theory by using the Jaguar 5.0 [1] suite of quantum chemistry software. Fully optimized molecular structures were obtained through minimum-energy geometry optimizations at the DFT/B3LYP (LACVP, 6-31G(2df), 6-31G(d), 6-31G, 3-21G) in a broken symmetry (BS) state. In this state the  $\alpha$  and  $\beta$  electron densities are allowed to localize on different atomic centers, which provides a reasonable description of the multi-configurational character within the framework of DFT. Calculations of electronic and structural properties of the fully relaxed structures allow direct comparisons with experimental measurements, including the analysis of geometrical parameters such as bond lengths, bond angles and dihedral angles, and electronic properties such as spin populations, exchange coupling constants and electrostatic potential (ESP) atomic charges. Ionic spin states were characterized according to the analysis of Mulliken atomic spin density populations.

### DFT Structural Models.

The X-ray atomic coordinates of complex **1** were obtained from the Cambridge Crystallographic Data Center (CCDC) with reference code SAWYEU [2]. Preparation of the models was subject to the constraints of total charge and total spin multiplicity, consistent with experimental data. Different arrangements of individual spin states were analyzed (subject to the constraints of total charge and spin multiplicity) by relaxing the molecular structures from appropriate initial-guess spin-electronic states, based on ligand field theory. Direct comparisons with both experimental magnetic and X-ray diffraction data allow one to evaluate the capabilities of the DFT/B3LYP methodology with regards to both electronic and structural properties, beyond the minimum energy criteria. Furthermore, the comparative analysis of both complete molecular structures and simplified models allows one to evaluate the capabilities and limitations of simplified model systems that might significantly reduce the computational cost of the calculations, and the effect of large and bulky substituents on the minimum energy geometries of the complexes.

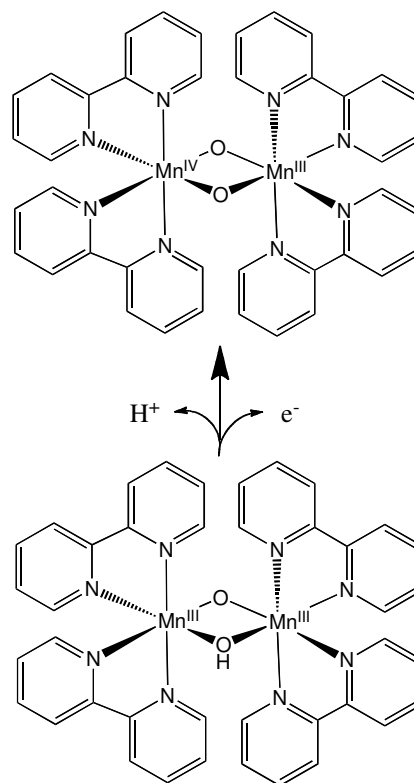

**Figure S1.** Schematic diagram of PCET in complex **1**.

### Table S1.

Comparison between DFT/B3LYP and X-ray experimental inter-atomic distances (Å) in **1**.

| Bond           | Experimental | DFT/B3LYP |
|----------------|--------------|-----------|
| Mn(III)–Mn(IV) | 2.71         | 2.72      |
| Mn(III)–O      | 1.84         | 1.87      |
| Mn(IV)–O       | 1.79         | 1.76      |

**Cartesian Coordinates of Complex 1:****Complex 1**

Number of atoms in complex 1: 84

|     |               |               |               |
|-----|---------------|---------------|---------------|
| Mn1 | 0.4524353877  | -0.8337746418 | 0.7354883506  |
| Mn2 | -0.3490546863 | 1.0732684572  | -1.0330242090 |
| O3  | -0.9478269166 | -0.4687817893 | -0.4403202380 |
| O4  | 1.0106144569  | 0.8082878162  | 0.0472466231  |
| N5  | 0.0675364889  | -2.9454752125 | 0.9013087940  |
| N6  | -0.9427733998 | -0.5009190228 | 2.4592338387  |
| N7  | 1.7025417047  | -0.7871440513 | 2.4846772084  |
| N8  | 0.3976479618  | 0.1944258584  | -2.6920440505 |
| N9  | 0.5740498756  | 2.7085898382  | -1.9761868876 |
| N10 | -1.2396990185 | 2.2879717707  | 0.3144924862  |
| C11 | -1.0557800248 | -3.4424106894 | 1.4559331086  |
| C12 | -2.2764267294 | -0.3809051714 | 2.3219618865  |
| C13 | -3.1292676400 | -0.3868306396 | 3.4236296629  |
| C14 | -2.5708477816 | -0.5226314318 | 4.6981477116  |
| C15 | -1.1870119705 | -0.6387737957 | 4.8312609591  |
| C16 | -0.3845431604 | -0.6224532581 | 3.6842443408  |
| C17 | 1.0878690055  | -0.7242527431 | 3.6988131641  |
| C18 | 1.0937317969  | 0.9915477003  | -3.5477424071 |
| C19 | 1.2183515258  | 2.3933107201  | -3.1331668963 |
| C20 | 1.9381964297  | 3.3583579607  | -3.8377114272 |
| C21 | 2.0034718881  | 4.6624648191  | -3.3432193504 |
| C22 | 1.3470988294  | 4.9689759349  | -2.1517461182 |
| C23 | 0.6403241778  | 3.9629263795  | -1.4950141980 |
| C24 | -0.6358759480 | 2.6634202126  | 1.4610692619  |
| C25 | 0.1861728672  | -1.1067992908 | -2.9784293164 |
| C26 | 1.6117628541  | 0.4635629682  | -4.7324690023 |
| C27 | 0.6744544457  | -1.6788300887 | -4.1499664988 |
| C28 | 1.4016586953  | -0.8816721021 | -5.0373218773 |
| C29 | -2.4757944328 | 2.7577511516  | -0.0074763391 |
| C30 | -1.2546721310 | 3.5346023367  | 2.3534029524  |
| C31 | -3.1425531493 | 3.6272724000  | 0.8584882202  |
| C32 | -2.5289136715 | 4.0194259682  | 2.0485300581  |
| C33 | 1.0141432141  | -3.7990547466 | 0.4205008894  |
| C34 | -1.2850499346 | -4.8106129584 | 1.5783932790  |
| C35 | -0.3121544139 | -5.6951933068 | 1.1145785357  |
| C36 | 0.8439063645  | -5.1809618474 | 0.5267910486  |
| C37 | 1.8394530706  | -0.7221872579 | 4.8756128053  |
| C38 | 3.0484414809  | -0.8175066920 | 2.4210190746  |
| C39 | 3.8493213801  | -0.8061450821 | 3.5602619978  |
| C40 | 3.2323904910  | -0.7680266402 | 4.8101212977  |
| H41 | -4.1996389456 | -0.2995428993 | 3.2876923222  |
| H42 | -0.7502562735 | -0.7503539314 | 5.8139439293  |
| H43 | 2.4482545409  | 3.1057362837  | -4.7572013914 |
| H44 | 1.3777205789  | 5.9666856607  | -1.7332776721 |
| H45 | -3.2016220162 | -0.5432147045 | 5.5786359881  |
| H46 | 2.5602955760  | 5.4197017771  | -3.8813124861 |
| H47 | 0.4802766127  | -2.7224038930 | -4.3614062903 |
| H48 | 1.7927530759  | -1.2937939795 | -5.9597692750 |
| H49 | 2.1610643444  | 1.0931670846  | -5.4188639824 |
| H50 | -0.3874196565 | -1.6581268741 | -2.2463959388 |
| H51 | -4.1225391322 | 4.0078842673  | 0.6054935114  |
| H52 | -3.0376514697 | 4.7015624018  | 2.7190222893  |
| H53 | -0.7430857870 | 3.8294639782  | 3.2604800204  |
| H54 | -0.4483348006 | -6.7664469811 | 1.1978195941  |
| H55 | 1.5972702557  | -5.8569671256 | 0.1474096038  |
| H56 | 4.9270471229  | -0.8286630123 | 3.4637371605  |
| H57 | 3.8188458012  | -0.7651561588 | 5.7206939097  |

|     |               |               |               |
|-----|---------------|---------------|---------------|
| H58 | -2.2028435456 | -5.1669881997 | 2.0278490886  |
| H59 | 1.3503752139  | -0.6747721659 | 5.8384522957  |
| H60 | 3.4849439046  | -0.8522339058 | 1.4352107815  |
| C61 | 4.3313958143  | -3.2075126888 | -1.3310863747 |
| C62 | 3.2876760541  | -3.8960452747 | -0.7124124100 |
| C63 | 2.1819590961  | -3.1811736310 | -0.2371480229 |
| N64 | 2.1259693958  | -1.8372131968 | -0.3704494542 |
| C65 | 3.1248484282  | -1.1655962530 | -0.9730037824 |
| C66 | 4.2508039892  | -1.8186913198 | -1.4697813646 |
| H67 | 5.1957109887  | -3.7503411348 | -1.6942114312 |
| H68 | 3.3473580000  | -4.9693716035 | -0.5974357487 |
| H69 | 2.9968102706  | -0.0915503889 | -1.0308709075 |
| H70 | 5.0463033805  | -1.2558412612 | -1.9411661559 |
| C71 | -4.6718394373 | 2.1178954540  | -3.0266132579 |
| C72 | -4.2681858687 | 2.6189509159  | -1.7874037918 |
| C73 | -3.0003977868 | 2.3017928664  | -1.2994995870 |
| N74 | -2.1516209292 | 1.5169841001  | -2.0182215697 |
| C75 | -2.5400881322 | 1.0295407485  | -3.2101236427 |
| C76 | -3.7954547488 | 1.3084211867  | -3.7481520153 |
| H77 | -5.6544216255 | 2.3566936522  | -3.4145102856 |
| H78 | -4.9408278969 | 3.2427877399  | -1.2148676448 |
| H79 | -1.8375690232 | 0.4006297866  | -3.7357363720 |
| H80 | -4.0724316936 | 0.8974307379  | -4.7103895681 |
| H81 | -1.7799751640 | -2.7240697316 | 1.8066370416  |
| H82 | -2.6347751802 | -0.2942535191 | 1.3034371947  |
| H83 | 0.1259971642  | 4.1599064919  | -0.5666640777 |
| H84 | 0.3493332211  | 2.2499790720  | 1.6263582302  |

**Complex 1<sub>red</sub> (Reduced form of Complex 1)**Number of atoms in complex 1<sub>red</sub>: 85

|     |               |               |               |
|-----|---------------|---------------|---------------|
| Mn1 | 0.4275332270  | -1.0685285056 | 0.7860964744  |
| Mn2 | -0.4905758357 | 1.0092539224  | -1.0077308206 |
| O3  | -1.1952008167 | -0.7792149650 | -0.4261502767 |
| O4  | 0.7841741815  | 0.5848032379  | 0.1879012240  |
| N5  | 0.1726063928  | -3.1198297469 | 1.0747504270  |
| N6  | -0.8948246950 | -0.6287581513 | 2.5132846273  |
| N7  | 1.7652660620  | -0.9052296734 | 2.5492472073  |
| N8  | 0.4019366569  | 0.1696071661  | -2.9060692128 |
| N9  | 0.6625036020  | 2.6449217882  | -1.9113432713 |
| N10 | -1.4330594176 | 2.3885560875  | 0.3612139541  |
| C11 | -0.8528554375 | -3.6544010848 | 1.7692238587  |
| C12 | -2.2315153706 | -0.4938527397 | 2.3942458260  |
| C13 | -3.0576301271 | -0.3452939212 | 3.5061698213  |
| C14 | -2.4724376952 | -0.3352375806 | 4.7749778849  |
| C15 | -1.0881039273 | -0.4611050692 | 4.8892042537  |
| C16 | -0.3094295393 | -0.6043311193 | 3.7345625106  |
| C17 | 1.1639271590  | -0.7221569770 | 3.7517445359  |
| C18 | 1.0626970688  | 1.0604144194  | -3.6841010865 |
| C19 | 1.2190294267  | 2.4216848426  | -3.1291897433 |
| C20 | 1.9246352573  | 3.4352814133  | -3.7837737795 |
| C21 | 2.0728452940  | 4.6808715615  | -3.1715885689 |
| C22 | 1.5172068192  | 4.8858577974  | -1.9089723487 |
| C23 | 0.8155227472  | 3.8402451545  | -1.3124313502 |
| C24 | -0.9116122942 | 2.7293597754  | 1.5537363684  |
| C25 | 0.2452891045  | -1.1026924279 | -3.3198642630 |
| C26 | 1.5699735814  | 0.6724650188  | -4.9308929093 |
| C27 | 0.7237281930  | -1.5496545519 | -4.5486291727 |
| C28 | 1.3945062803  | -0.6391980038 | -5.3696059554 |
| C29 | -2.5595747658 | 2.9826198214  | -0.1001762471 |
| C30 | -1.5054272240 | 3.7041889490  | 2.3537933144  |
| C31 | -3.2038919094 | 3.9634008264  | 0.6591963739  |

|     |               |               |               |
|-----|---------------|---------------|---------------|
| C32 | -2.6692984838 | 4.3280382725  | 1.8964646186  |
| C33 | 1.1148928925  | -3.9369508988 | 0.5197084004  |
| C34 | -0.9852357381 | -5.0285279059 | 1.9525386308  |
| C35 | -0.0221272356 | -5.8745201668 | 1.4026667041  |
| C36 | 1.0342264520  | -5.3205705038 | 0.6776997976  |
| C37 | 1.9257467270  | -0.6189576855 | 4.9191174962  |
| C38 | 3.1071222939  | -0.9606887190 | 2.4718019564  |
| C39 | 3.9217356337  | -0.8532613195 | 3.5970103617  |
| C40 | 3.3176999113  | -0.6882233085 | 4.8432416744  |
| H41 | -4.1283774839 | -0.2482522486 | 3.3806811746  |
| H42 | -0.6291685744 | -0.4543029648 | 5.8678791485  |
| H43 | 2.3629438693  | 3.2644733215  | -4.7568083499 |
| H44 | 1.6211492678  | 5.8323094477  | -1.3943743190 |
| H45 | -3.0807097386 | -0.2330944725 | 5.6655568757  |
| H46 | 2.6188562863  | 5.4701626924  | -3.6735991787 |
| H47 | 0.5704628000  | -2.5763882862 | -4.8551406539 |
| H48 | 1.7759980564  | -0.9417052684 | -6.3372789021 |
| H49 | 2.0911867433  | 1.3804211698  | -5.5596770436 |
| H50 | -0.2704106561 | -1.7654195795 | -2.6383643369 |
| H51 | -4.0999232145 | 4.4484497311  | 0.2973022510  |
| H52 | -3.1550183848 | 5.0940551374  | 2.4888321623  |
| H53 | -1.0630356663 | 3.9723596527  | 3.3045159309  |
| H54 | -0.0884874686 | -6.9482132143 | 1.5290152079  |
| H55 | 1.7815406376  | -5.9670489088 | 0.2386307967  |
| H56 | 4.9982306075  | -0.8986898134 | 3.4942268237  |
| H57 | 3.9143706463  | -0.6071248788 | 5.7435083442  |
| H58 | -1.8230815382 | -5.4190410854 | 2.5154693355  |
| H59 | 1.4500122229  | -0.4773357399 | 5.8792671704  |
| H60 | 3.5319043467  | -1.0870141595 | 1.4867800419  |
| C61 | 4.2283406680  | -3.1468653584 | -1.5037690815 |
| C62 | 3.2756964420  | -3.9053794644 | -0.8202627667 |
| C63 | 2.1767230762  | -3.2620649073 | -0.2446835493 |
| N64 | 2.0332165472  | -1.9184828736 | -0.3545285626 |
| C65 | 2.9449436183  | -1.1783148549 | -1.0117672216 |
| C66 | 4.0646619106  | -1.7624083798 | -1.6020083060 |
| H67 | 5.0893502927  | -3.6343260007 | -1.9452533802 |
| H68 | 3.4030291403  | -4.9755577649 | -0.7317933236 |
| H69 | 2.7513824020  | -0.1137790238 | -1.0355895012 |
| H70 | 4.7920398441  | -1.1478215167 | -2.1164951192 |
| C71 | -4.5359916150 | 2.4780438532  | -3.2951838759 |
| C72 | -4.1771722104 | 2.9719323548  | -2.0406406740 |
| C73 | -3.0064842230 | 2.5246054627  | -1.4264720575 |
| N74 | -2.2060699286 | 1.6087634052  | -2.0460780494 |
| C75 | -2.5548054069 | 1.1279732801  | -3.2574075292 |
| C76 | -3.7124981459 | 1.5371376715  | -3.9135350852 |
| H77 | -5.4435852539 | 2.8232287291  | -3.7750479089 |
| H78 | -4.8103500770 | 3.6970199047  | -1.5484970207 |
| H79 | -1.8877372647 | 0.4051125125  | -3.7021466573 |
| H80 | -3.9563506118 | 1.1259624877  | -4.8845514976 |
| H81 | -1.5717670516 | -2.9624684845 | 2.1807253714  |
| H82 | -2.6098042618 | -0.5111211848 | 1.3809953018  |
| H83 | 0.3692524965  | 3.9532006870  | -0.3357592781 |
| H84 | -0.0073840696 | 2.2050466760  | 1.8350606911  |
| H85 | -1.6605282376 | -1.4265378990 | -0.9783130382 |

**Spin Population Analysis:****Complex 1**

|      |          |          |          |          |          |
|------|----------|----------|----------|----------|----------|
| Atom | Mn1      | Mn2      | O3       | O4       | N5       |
| Spin | 3.85841  | -2.58253 | -0.22845 | -0.22945 | -0.01347 |
| Atom | N6       | N7       | N8       | N9       | N10      |
| Spin | 0.04564  | -0.01392 | 0.03196  | 0.02401  | 0.03179  |
| Atom | C11      | C12      | C13      | C14      | C15      |
| Spin | 0.00900  | -0.00042 | 0.00087  | 0.00328  | 0.00135  |
| Atom | C16      | C17      | C18      | C19      | C20      |
| Spin | 0.00042  | 0.00752  | -0.00363 | -0.00221 | 0.00158  |
| Atom | C21      | C22      | C23      | C24      | C25      |
| Spin | -0.00553 | 0.00284  | -0.00705 | -0.01092 | -0.01098 |
| Atom | C26      | C27      | C28      | C29      | C30      |
| Spin | 0.00340  | 0.00602  | -0.00826 | -0.00363 | 0.00599  |
| Atom | C31      | C32      | C33      | C34      | C35      |
| Spin | 0.00339  | -0.00824 | 0.00742  | -0.00515 | 0.00936  |
| Atom | C36      | C37      | C38      | C39      | C40      |
| Spin | -0.00452 | -0.00460 | 0.00915  | -0.00524 | 0.00950  |
| Atom | H41      | H42      | H43      | H44      | H45      |
| Spin | 0.00079  | 0.00069  | 0.00021  | -0.00011 | -0.00026 |
| Atom | H46      | H47      | H48      | H49      | H50      |
| Spin | 0.00031  | -0.00046 | 0.00050  | 0.00034  | 0.00059  |
| Atom | H51      | H52      | H53      | H54      | H55      |
| Spin | 0.00034  | 0.00050  | -0.00046 | -0.00056 | 0.00019  |
| Atom | H56      | H57      | H58      | H59      | H60      |
| Spin | 0.00042  | -0.00056 | 0.00041  | 0.00018  | -0.00025 |
| Atom | C61      | C62      | C63      | N64      | C65      |
| Spin | 0.00324  | 0.00136  | 0.00042  | 0.04586  | -0.00048 |
| Atom | C66      | H67      | H68      | H69      | H70      |
| Spin | 0.00089  | -0.00026 | 0.00070  | 0.00188  | 0.00079  |
| Atom | C71      | C72      | C73      | N74      | C75      |
| Spin | -0.00549 | 0.00155  | -0.00218 | 0.02399  | -0.00702 |
| Atom | C76      | H77      | H78      | H79      | H80      |
| Spin | 0.00282  | 0.00030  | 0.00021  | 0.00089  | -0.00011 |
| Atom | H81      | H82      | H83      | H84      |          |
| Spin | -0.00022 | 0.00188  | 0.00089  | 0.00059  |          |

Sum of atomic spins: 1.0

**Complex 1<sub>red</sub> (Reduced form of Complex 1)**

|      |          |          |          |          |          |
|------|----------|----------|----------|----------|----------|
| Atom | Mn1      | Mn2      | O3       | O4       | N5       |
| Spin | 3.79731  | -3.80027 | -0.00196 | 0.00446  | -0.04618 |
| Atom | N6       | N7       | N8       | N9       | N10      |
| Spin | 0.03582  | 0.02502  | -0.04043 | -0.01442 | -0.02923 |
| Atom | C11      | C12      | C13      | C14      | C15      |
| Spin | 0.01441  | 0.00012  | 0.00070  | 0.00243  | 0.00022  |
| Atom | C16      | C17      | C18      | C19      | C20      |
| Spin | 0.00173  | 0.00298  | -0.00031 | -0.00426 | 0.00174  |
| Atom | C21      | C22      | C23      | C24      | C25      |
| Spin | -0.00520 | 0.00194  | -0.00309 | -0.00574 | 0.00122  |
| Atom | C26      | C27      | C28      | C29      | C30      |
| Spin | -0.00128 | -0.00155 | -0.00116 | -0.00201 | 0.00200  |
| Atom | C31      | C32      | C33      | C34      | C35      |
| Spin | 0.00026  | -0.00703 | 0.00981  | -0.00825 | 0.01332  |
| Atom | C36      | C37      | C38      | C39      | C40      |
| Spin | -0.00657 | -0.00081 | 0.00171  | -0.00084 | 0.00420  |
| Atom | H41      | H42      | H43      | H44      | H45      |
| Spin | 0.00060  | 0.00068  | -0.00053 | -0.00052 | -0.00021 |
| Atom | H46      | H47      | H48      | H49      | H50      |
| Spin | 0.00037  | -0.00065 | 0.00014  | -0.00068 | -0.00204 |
| Atom | H51      | H52      | H53      | H54      | H55      |
| Spin | -0.00045 | 0.00045  | -0.00085 | -0.00075 | -0.00017 |
| Atom | H56      | H57      | H58      | H59      | H60      |
| Spin | 0.00057  | -0.00032 | 0.00019  | 0.00062  | 0.00143  |
| Atom | C61      | C62      | C63      | N64      | C65      |
| Spin | 0.00898  | -0.00135 | 0.00351  | 0.01832  | 0.00837  |
| Atom | C66      | H67      | H68      | H69      | H70      |
| Spin | -0.00353 | -0.00056 | 0.00036  | 0.00112  | 0.00083  |
| Atom | C71      | C72      | C73      | N74      | C75      |
| Spin | -0.01238 | 0.00664  | -0.00971 | 0.04573  | -0.01301 |
| Atom | C76      | H77      | H78      | H79      | H80      |
| Spin | 0.00777  | 0.00070  | 0.00016  | 0.00143  | -0.00016 |
| Atom | H81      | H82      | H83      | H84      | H85      |
| Spin | -0.00154 | 0.00108  | -0.00107 | -0.00144 | 0.00100  |

Sum of atomic spins: 0.000000



**ESP atomic charges:****Complex 1**

|        |          |          |          |          |          |
|--------|----------|----------|----------|----------|----------|
| Atom   | Mn1      | Mn2      | O3       | O4       | N5       |
| Charge | -0.06023 | -0.38035 | -0.35021 | -0.35813 | -0.14245 |
| Atom   | N6       | N7       | N8       | N9       | N10      |
| Charge | 0.28630  | -0.11787 | 0.83277  | -0.16626 | 0.83670  |
| Atom   | C11      | C12      | C13      | C14      | C15      |
| Charge | 0.09191  | -0.07593 | -0.17210 | -0.06302 | -0.12533 |
| Atom   | C16      | C17      | C18      | C19      | C20      |
| Charge | -0.17077 | 0.29329  | -0.47944 | 0.46946  | -0.31306 |
| Atom   | C21      | C22      | C23      | C24      | C25      |
| Charge | 0.02068  | -0.17804 | 0.01237  | -0.29637 | -0.29874 |
| Atom   | C26      | C27      | C28      | C29      | C30      |
| Charge | -0.01827 | -0.09730 | -0.13238 | -0.48177 | -0.09700 |
| Atom   | C31      | C32      | C33      | C34      | C35      |
| Charge | -0.01976 | -0.13210 | 0.31931  | -0.22935 | 0.02494  |
| Atom   | C36      | C37      | C38      | C39      | C40      |
| Charge | -0.27463 | -0.26787 | 0.07629  | -0.22237 | 0.02182  |
| Atom   | H41      | H42      | H43      | H44      | H45      |
| Charge | 0.19214  | 0.18205  | 0.22389  | 0.20281  | 0.19425  |
| Atom   | H46      | H47      | H48      | H49      | H50      |
| Charge | 0.18685  | 0.19743  | 0.21267  | 0.17374  | 0.19998  |
| Atom   | H51      | H52      | H53      | H54      | H55      |
| Charge | 0.17416  | 0.21268  | 0.19670  | 0.18270  | 0.20737  |
| Atom   | H56      | H57      | H58      | H59      | H60      |
| Charge | 0.20605  | 0.18289  | 0.20692  | 0.20575  | 0.11464  |
| Atom   | C61      | C62      | C63      | N64      | C65      |
| Charge | -0.08229 | -0.09788 | -0.22444 | 0.34853  | -0.11250 |
| Atom   | C66      | H67      | H68      | H69      | H70      |
| Charge | -0.15402 | 0.19741  | 0.17729  | 0.14326  | 0.19015  |
| Atom   | C71      | C72      | C73      | N74      | C75      |
| Charge | 0.02207  | -0.31439 | 0.47400  | -0.17419 | 0.01673  |
| Atom   | C76      | H77      | H78      | H79      | H80      |
| Charge | -0.17974 | 0.18652  | 0.22388  | 0.14319  | 0.20280  |
| Atom   | H81      | H82      | H83      | H84      |          |
| Charge | 0.11203  | 0.13684  | 0.14323  | 0.20110  |          |

Sum of atomic charges: 3.0

**Complex 1<sub>red</sub> (Reduced form of Complex 1)**

|        |          |          |          |          |          |
|--------|----------|----------|----------|----------|----------|
| Atom   | Mn1      | Mn2      | O3       | O4       | N5       |
| Charge | 0.30958  | 0.10378  | -0.53254 | -0.51051 | -0.31080 |
| Atom   | N6       | N7       | N8       | N9       | N10      |
| Charge | 0.26991  | -0.20520 | 0.43484  | -0.14847 | 0.31080  |
| Atom   | C11      | C12      | C13      | C14      | C15      |
| Charge | 0.12914  | -0.02577 | -0.18086 | -0.07623 | -0.10643 |
| Atom   | C16      | C17      | C18      | C19      | C20      |
| Charge | -0.20523 | 0.34514  | -0.26856 | 0.32146  | -0.27528 |
| Atom   | C21      | C22      | C23      | C24      | C25      |
| Charge | 0.01928  | -0.20721 | 0.04520  | -0.05267 | -0.16529 |
| Atom   | C26      | C27      | C28      | C29      | C30      |
| Charge | -0.07819 | -0.13471 | -0.10418 | -0.25245 | -0.17396 |
| Atom   | C31      | C32      | C33      | C34      | C35      |
| Charge | -0.08107 | -0.06971 | 0.43032  | -0.22786 | 0.04963  |
| Atom   | C36      | C37      | C38      | C39      | C40      |
| Charge | -0.30886 | -0.29663 | 0.07045  | -0.22273 | 0.03654  |
| Atom   | H41      | H42      | H43      | H44      | H45      |
| Charge | 0.19836  | 0.17581  | 0.20637  | 0.20284  | 0.19641  |
| Atom   | H46      | H47      | H48      | H49      | H50      |
| Charge | 0.18174  | 0.19344  | 0.20316  | 0.17522  | 0.12001  |
| Atom   | H51      | H52      | H53      | H54      | H55      |
| Charge | 0.17203  | 0.19702  | 0.19659  | 0.18128  | 0.21790  |
| Atom   | H56      | H57      | H58      | H59      | H60      |
| Charge | 0.20250  | 0.17750  | 0.20920  | 0.20918  | 0.12276  |
| Atom   | C61      | C62      | C63      | N64      | C65      |
| Charge | -0.08646 | -0.05007 | -0.27486 | 0.25951  | -0.07331 |
| Atom   | C66      | H67      | H68      | H69      | H70      |
| Charge | -0.14246 | 0.19868  | 0.16625  | 0.13409  | 0.19005  |
| Atom   | C71      | C72      | C73      | N74      | C75      |
| Charge | 0.04455  | -0.30393 | 0.40905  | -0.23992 | 0.07826  |
| Atom   | C76      | H77      | H78      | H79      | H80      |
| Charge | -0.21709 | 0.18136  | 0.21756  | 0.11343  | 0.20688  |
| Atom   | H81      | H82      | H83      | H84      | H85      |
| Charge | 0.09947  | 0.08168  | 0.12750  | 0.12929  | 0.35652  |

Sum of atomic charges: 3.000000

## Thermodynamic Cycle and Thermodynamic Energy Data

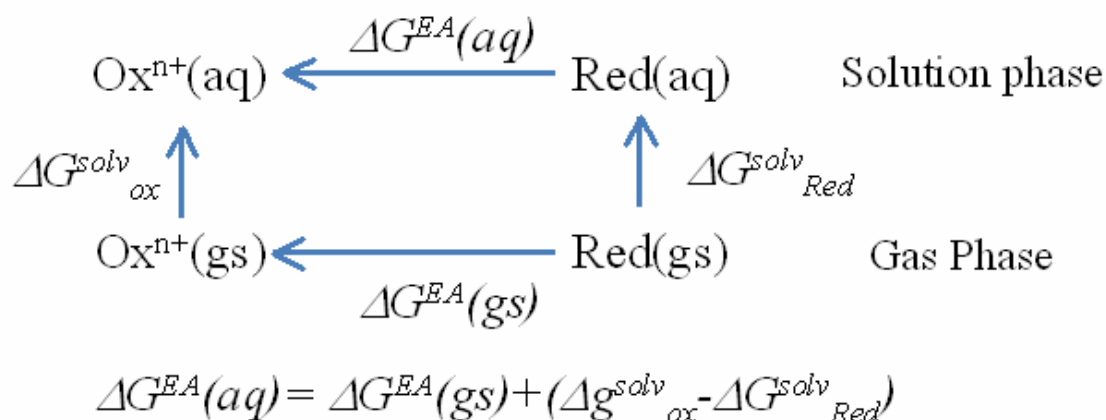

**Table S2.** Thermodynamic energy data for complex **1** in various oxidation and protonation states, including the zero point energy (ZPE), entropy (S) and enthalpy in the gas phase ( $H_g$ ), solvation free energies ( $G_{\text{solv}}$ ) and free energies in the gas phase ( $G_g$ ), computed at room temperature,  $T=298.15\text{K}$ . The solvation free energy of a proton in aqueous solutions was defined as  $G_{\text{solv}}(\text{H}^+) = -260 \text{ kcal mol}^{-1}$ , as in Refs. [3,4,5].

|                                                                                                  | $H_g$<br>eV  | $G_g$<br>eV  |
|--------------------------------------------------------------------------------------------------|--------------|--------------|
| $[(\text{bpy})_4\text{Mn}^{\text{III}}(\mu\text{-O})_2\text{Mn}^{\text{III}}]^{2+}$              | -63650.07246 | -63633.06647 |
| $[(\text{bpy})_4\text{Mn}^{\text{III}}(\mu\text{-O})(\mu\text{-OH})\text{Mn}^{\text{III}}]^{3+}$ | -63656.68789 | -63639.44604 |
| $[(\text{bpy})_4\text{Mn}^{\text{III}}(\mu\text{-O})_2\text{Mn}^{\text{IV}}]^{3+}$               | -63639.42202 | -63622.14780 |
| $[(\text{bpy})_4\text{Mn}^{\text{III}}(\mu\text{-O})(\mu\text{-OH})\text{Mn}^{\text{IV}}]^{4+}$  | -63642.65612 | -63625.65647 |

|                                                                                                  | ZPE<br>$\text{kcal mol}^{-1}$ | S<br>$\text{Cal mol}^{-1} \text{K}^{-1}$ | $G_{\text{solv}}$<br>eV |
|--------------------------------------------------------------------------------------------------|-------------------------------|------------------------------------------|-------------------------|
| $[(\text{bpy})_4\text{Mn}^{\text{III}}(\mu\text{-O})_2\text{Mn}^{\text{III}}]^{2+}$              | 455.496                       | 210.458                                  | -4.91218                |
| $[(\text{bpy})_4\text{Mn}^{\text{III}}(\mu\text{-O})(\mu\text{-OH})\text{Mn}^{\text{III}}]^{3+}$ | 462.951                       | 217.192                                  | -10.65361               |
| $[(\text{bpy})_4\text{Mn}^{\text{III}}(\mu\text{-O})_2\text{Mn}^{\text{IV}}]^{3+}$               | 456.325                       | 211.688                                  | -10.64256               |
| $[(\text{bpy})_4\text{Mn}^{\text{III}}(\mu\text{-O})(\mu\text{-OH})\text{Mn}^{\text{IV}}]^{4+}$  | 452.221                       | 219.191                                  | -18.69101               |

**References for Supporting Information:**

- (1) *Jaguar*, version 5.0 ; Schrodinger, Inc: Portland, OR, 2000.
- (2) Wilson, C.; Larsen, F. K.; Figgis, B. N. *Acta Cryst. Sec. C-Crystal Struct. Comm.* **1998**, *54*, 1797-1799
- (3) Jang, Y. H.; Sowers, L. C.; Cagin, T.; Goddard, W. A. *J. Phys. Chem. A* **2001**, *105*, 274-280.
- (4) Lim, C.; Bashford, D.; Karplus, M. *J. Phys. Chem.* **1991**, *95*, 5610-5620
- (5) Reiss, H.; Heller, A. *J. Phys. Chem.* **1985**, *89*, 4207-4213.
